# Supplementary material for: USP46 Inhibits Cell Proliferation in Lung Cancer through PHLPP1/AKT Pathway
Source: Hindawi journal article supplement (doi:10.1155/2020/2509529), 2020-01-01
Supplement: f1 [file 2509529.f1.pdf]

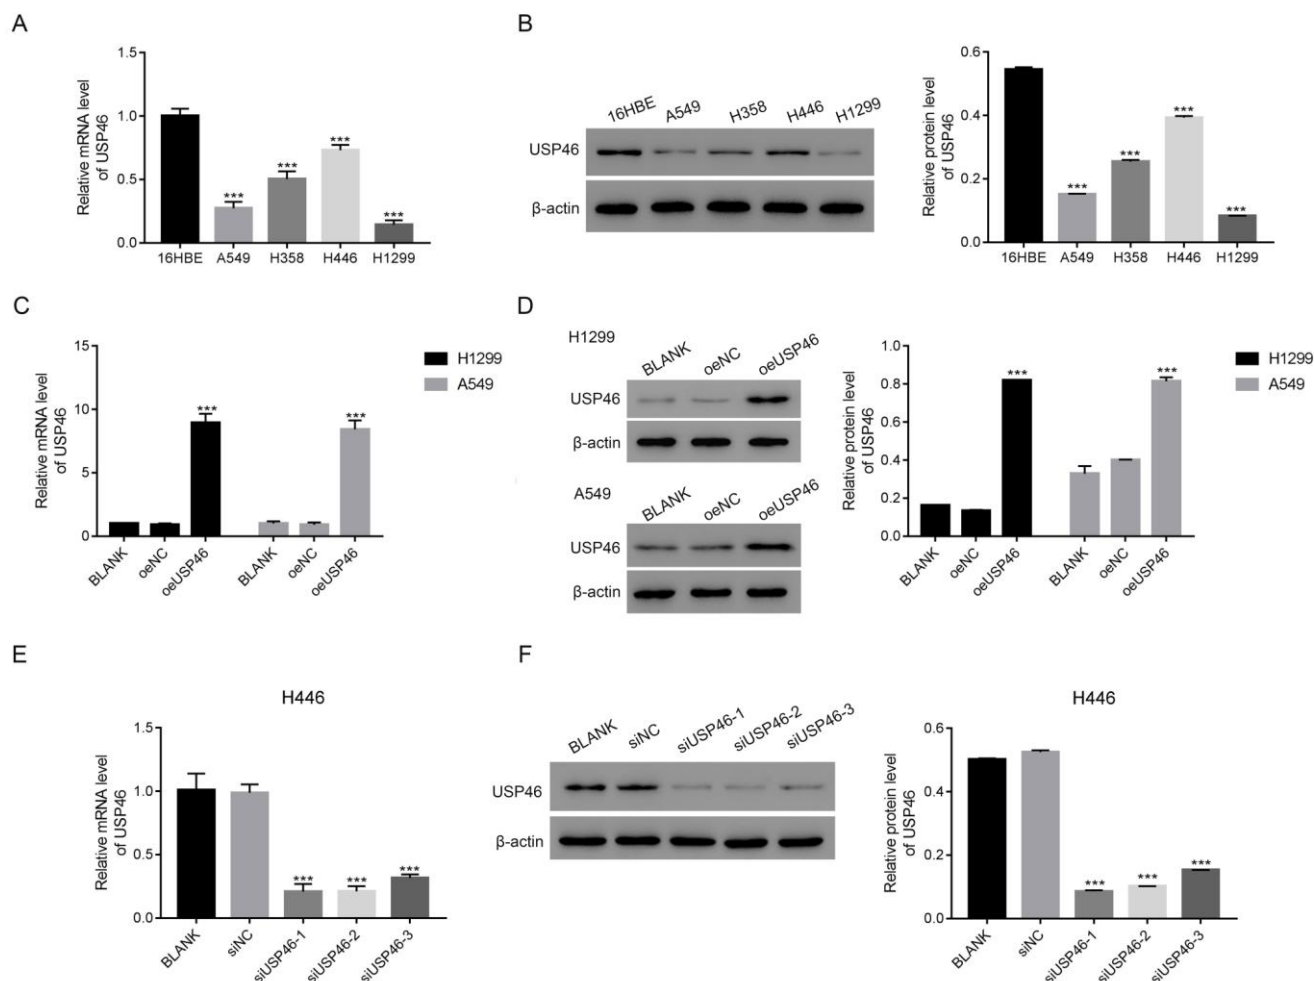

383

384

385

386

387

388

389

390

391

**Figure S1: Expression of USP46 in human lung cancer cells was measured.** A & B. Relative mRNA and protein levels of USP46 in normal human bronchial epithelium (HBE) cells and indicated human lung cancer cells were measured by qRT-PCR (A) and WB (B) respectively, and the protein levels were quantified. Mean  $\pm$  SD, (n=3), \*\*\* means  $p < 0.001$ . C & D. Relative mRNA and protein levels of USP46 in indicated human lung cancer cells overexpressing USP46 were measured by RT-PCR (C) and WB (D) respectively, and the protein levels were quantified. USP46 mRNA level was normalized to beta-actin mRNA. Mean  $\pm$  SD, (n=3), \*\*\* means  $p < 0.001$ . E & F. Relative mRNA and protein levels of USP46 in H446 cells upon USP46 knock down were measured by qRT-PCR (E) and WB (F) respectively, and the protein levels were quantified. Mean  $\pm$  SD, (n=3), \*\*\* means  $p < 0.001$ .
